# Supplementary material for: Metabolic phenotype of methylmalonic acidemia in mice and humans: the role of skeletal muscle
Source: Springer Nature journal article supplement (doi:10.1186/1471-2350-8-64), 2007-10-15
Supplement: Additional file 2 [file 1471-2350-8-64-s2.pdf]

Primers for PCR and RT-PCR

| Primer Name                    | Sequence (5'-3')          |
|--------------------------------|---------------------------|
| Lox P 5' (genotyping primer A) | ccattctgggaaggcttcta      |
| Lox P 3' (genotyping primer B) | tgcacagagtgctagttcca      |
| Exon 2 Mut 5' (RT-PCR primer)  | gaccgttctcatttcctttgg     |
| Exon 6 Mut 3' (RT-PCR primer)  | cttcagagcagcctcataaacgtc  |
| Exon 3 Mut (RT-PCR primer)     | cagttctaaaatggcatcagtcc   |
| Exon 4 Mut (RT-PCR primer)     | gcaggcttagtactgtggaaga    |
| GAPDH 5' (RT-PCR primer)       | tgaaggtcgggtgtaacggatttgg |
| GAPDH 3' (RT-PCR primer)       | catgtaggccatgaggtccaccac  |
