# Supplementary material for: Metabolic phenotype of methylmalonic acidemia in mice and humans: the role of skeletal muscle
Source: Springer Nature journal article supplement (doi:10.1186/1471-2350-8-64), 2007-10-15
Supplement: Additional file 5 [file 1471-2350-8-64-s5.pdf]

## 2-Methylcitrate I/II Ratios in Mouse Organs

|                                      | Brain | All other tissue |     | P-value |
|--------------------------------------|-------|------------------|-----|---------|
| Wild type                            | 1.32  | 1.67             | n=2 | NS      |
| Prenatal Muto                        | 1.26  | 1.38             | n=3 | NS      |
| Neonatal Muto                        | 2.01  | 1.57             | n=3 | 0.001   |
| Metabolic<br>decompensation,<br>Muto | 2.04  | 1.41             | n=2 | 0.0002  |
